# Supplementary material for: Epigenetic dynamics of monocyte-to-macrophage differentiation
Source: PubMed Central journal article supplement (PMC4967341; doi:10.1186/s13072-016-0079-z), 2016-07-29

**DMR1**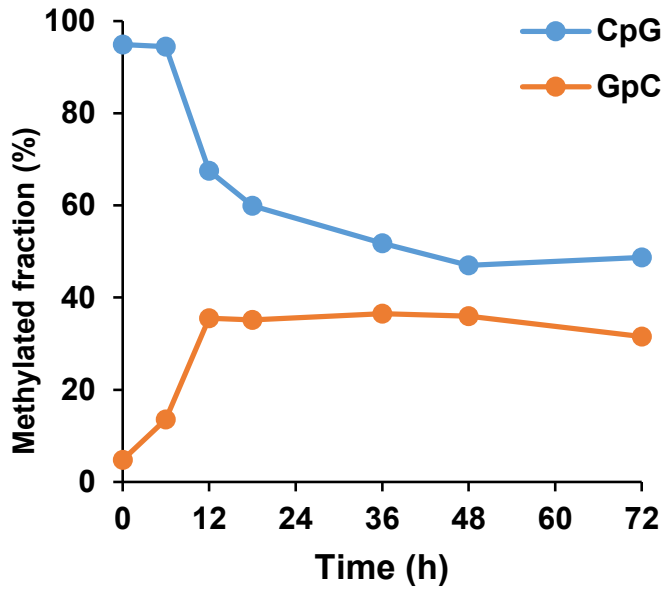**DMR2**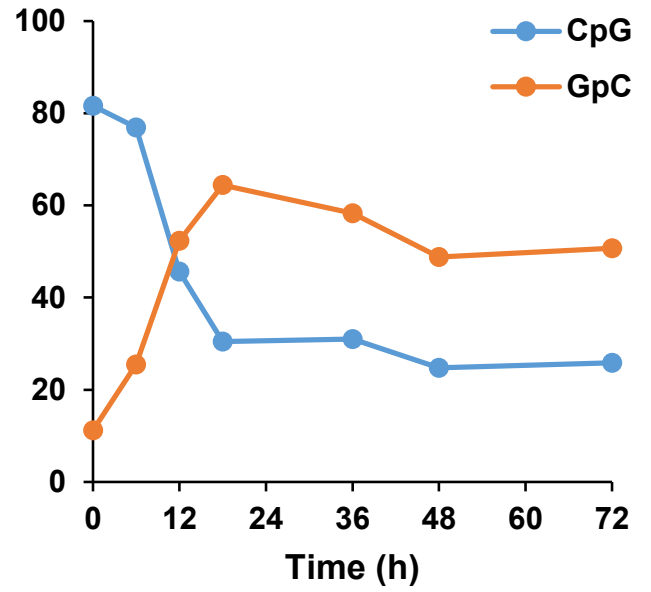**DMR10**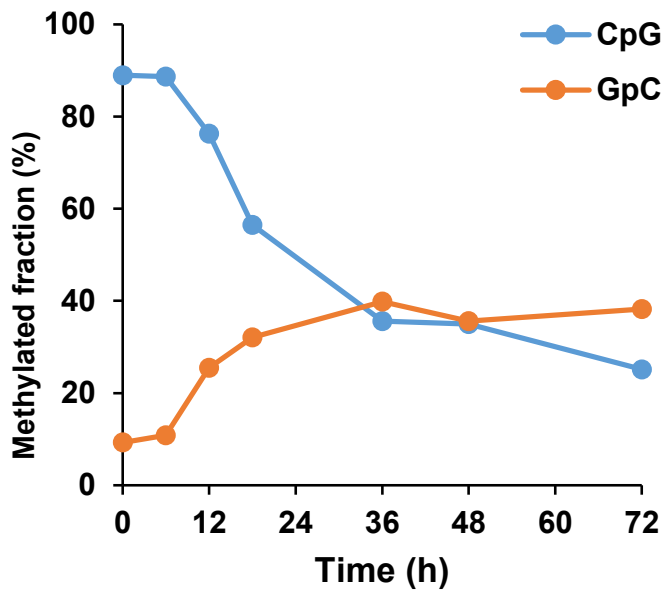**DMR13**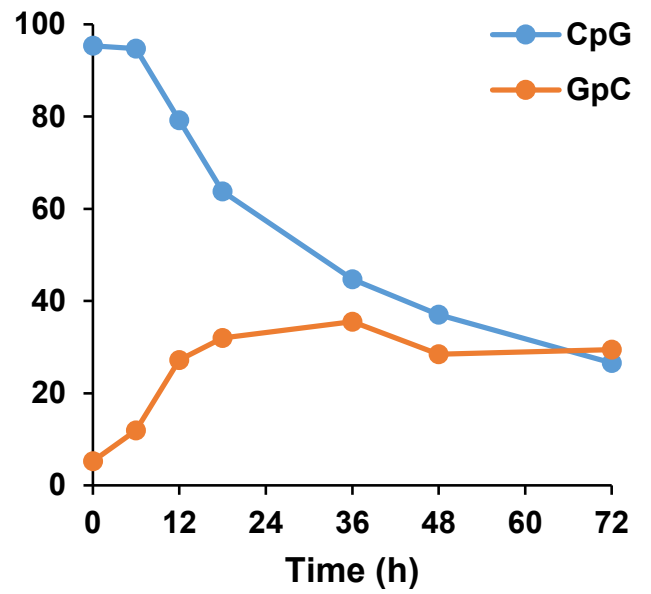

Supplement: 13072_2016_79_MOESM10_ESM.pdf [file 13072_2016_79_MOESM10_ESM.pdf]
